# Supplementary material
Source: publisher figshare collection journal article supplement (https://karger.figshare.com/ndownloader/files/38900910)
Supplement: Supplementary file 1 [file 38900910]

| **Author Name** | **Hospital** | **City** | **Country** |
| --- | --- | --- | --- |
| Henriette Arts | University Medical Center Groningen | Groningen | The Netherlands |
| Irene van der Avoort | Ikazia Hospital | Rotterdam | The Netherlands |
| Astrid Baalbergen | Reinier de Graaf Hospital | Delft | The Netherlands |
| Lotte Boog | Antoni van Leeuwenhoek Hospital | Amsterdam | The Netherlands |
| Erik Boss | Maxima Medisch Center | Eindhoven | The Netherlands |
| Gabriela Dias Pereira | Rode Kruis Hospital | Beverwijk | The Netherlands |
| Majoie Hemelaar | West Fries Gasthuis | Hoorn | The Netherlands |
| Ineke Janssen | Groene Hart Hospital | Gouda | The Netherlands |
| Michaela Kalafusofa | Treant Zorggroep | Emmen | The Netherlands |
| Jose Kramer | Amsterdam University Medical Center | Amsterdam | The Netherlands |
| Marleen de Lange | Amsterdam University Medical Center | Amsterdam | The Netherlands |
| Eva-Maria Roes | Erasmus Medical Center | Rotterdam | The Netherlands |
| Sabina Rombout-de Weerd | Albert Schweizer Hospital | Dordrecht | The Netherlands |
| Maaike Stapert | Alrijne | Leiderdorp | The Netherlands |
| Peet Stienstra | Wilhelmina Hospital | Assen | The Netherlands |
| Annelies Verdonckschot | Ter Gooi Hospital | Hilversum | The Netherlands |
| Jos Vollenbergh | Hospital Bernhoven | Uden | The Netherlands |
| Anneke Westermann | Amsterdam University Medical Center | Amsterdam | The Netherlands |

**Supplementary material 1: Co-authors of the Trophy Study Group**
